# Supplementary material for: Possible Role of Insulin-Degrading Enzyme in the Physiopathology of Retinitis Pigmentosa
Source: MDPI journal article supplement (doi:10.3390/cells11101621), 2022-05-12
Supplement: s1 [file s1]

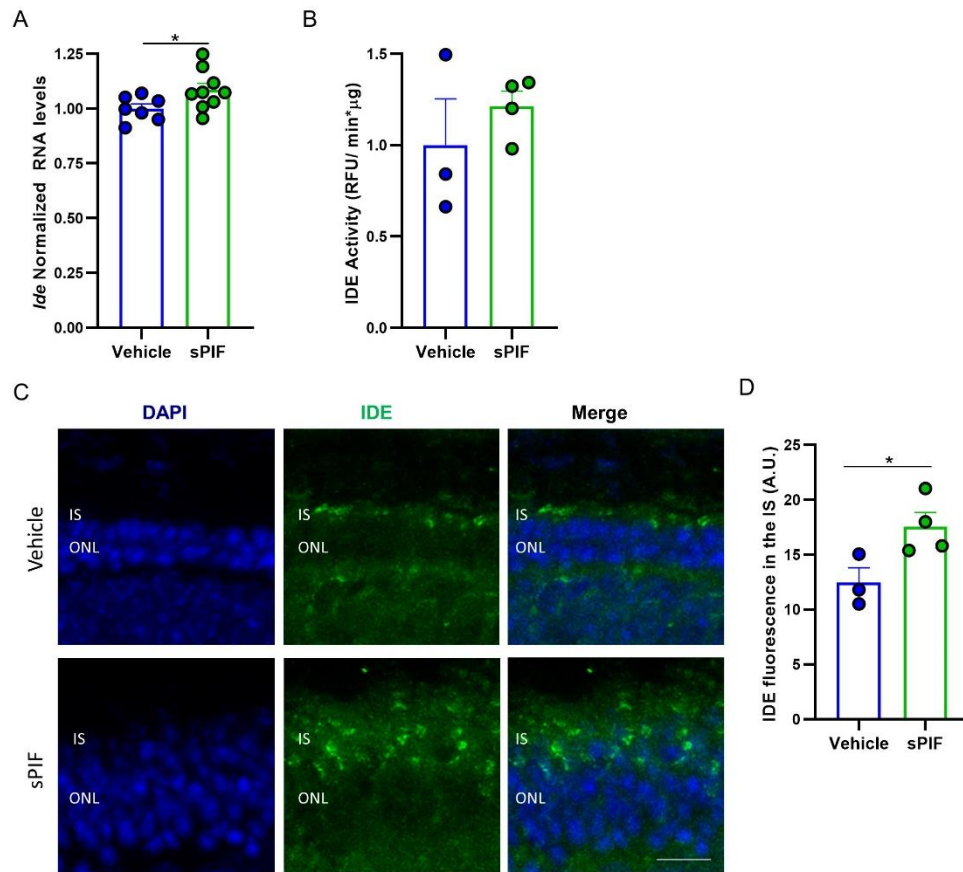

**Supplementary Figure S1.** Effect of sPIF on IDE levels. *rd10* mice received daily intraperitoneal injections of vehicle or sPIF. **(A)** RT-qPCR analysis of individual retinas from *rd10* animals treated from P15 to P25–28. **(B)** IDE activity measured by fluorometric assay in retinas of mice treated from P15–P28. Results represent the mean + SEM.  $n=7-9$  individual retinas from 7–9 mice (A) or  $n=$  the mean of both retinas of 3–4 mice (B). **(C)** Representative images showing retinal sections at P29 immunostained for IDE (green) from *rd10* mice. Nuclei were stained with DAPI (blue). IS, inner segment; ONL, outer nuclear layer; AU, arbitrary units. Scale bar: 10 μm. **(D)** Quantification of IDE fluorescence in the cone IS (area under the curve, see Methods section) of the mice mentioned in C.  $n=3-4$  individual retinas from 3–4 mice. \* $p<0.05$  (unpaired 2-tailed Student's *t* test).

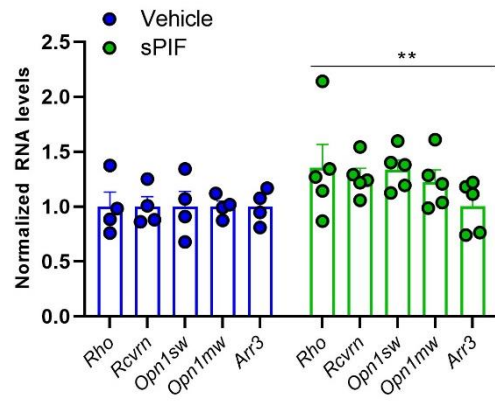

**Supplementary Figure S2.** Effect of sPIF treatment on photoreceptor gene expression. *rd10* mice received daily intraperitoneal injections of vehicle or sPIF from P15 to P27 inclusive. RT-qPCR analysis of individual retinas from sPIF- and vehicle-treated *rd10* mice at P29, after performing the ERG. Transcript levels were normalized to *Tbp* RNA levels and expressed relative to corresponding WT levels (= 1). Results represent the mean + SEM.  $n= 4-5$  individual retinas from 4-5 mice.  $**p < 0.01$  (2-way ANOVA). *Arr3*, cone arrestin; *Opn1mw*, L/M-Opsin; *Opn1sw*, S-Opsin; *Rcvrn*, Recoverin; *Rho*, Rhodopsin.
